# Supplementary material for: Soil nitrous oxide emissions from global land ecosystems and their drivers within the LPJ-GUESS model (v4.1)
Source: Copernicus journal article supplement (doi:10.5194/gmd-2024-223), 2024-12-20
Supplement: Supplementary file [file gmd-2024-223-AC2-supplement.pdf]

## Response to anonymous referee #2 (Comments in black, Answers in blue, Suggested revisions in green)

### General comments:

*Ma et al. describe a new parametrization for soil mineral N transformation in the widely used DGVM LPJ-GUESS model. They mainly take NH<sub>3</sub> volatilization, nitrification, and denitrification processes into account, with well explaining the mechanistic parametrization of N dynamics. They also provide a global evaluation of the model development in terms of simulated N<sub>2</sub>O fluxes among land ecosystems. Overall this is a well written paper with a good structure in simulation experiment design and assessment results. Although modelling soil N<sub>2</sub>O emissions is a challenging work with large uncertainties, authors do a good job by giving a solid discussion on model limitations of N transformation which are well referenced. I think this is an exciting and timely work that greatly advances existing modeling tool and will benefit to biogeochemical research community, it can be accepted by GMD for publication after minor adjustments.*

We thank the reviewer for the expressed interest in our manuscript. In the revisions to the manuscript we will be addressing the raised questions as described below.

### Specific comments:

*The new model development section is clear and thorough; however, the model simulation protocol needs to be further clarified. For instance, in sections 2.3.1 and 2.3.2, are the forcing data (e.g., climate and N deposition) the same for the site-specific and global runs? Additionally, how does LPJG estimate the dynamics of soil pH during N transformation processes? A brief description of the model's representation of soil physical properties should also be included in section 2.3.*

Thanks for this comment. In this study, the climate forcing and N deposition inputs are identical between the site-specific and global runs. We have clarified this in our original manuscript (Lines 334-337): “Due to the lack of weather and N deposition data for most study sites, an observation-based gridded climate dataset, CRUJRA v2.4 (Harris et al., 2020; Kobayashi et al., 2015), and an atmospheric N deposition dataset simulated by CCM1 (NH<sub>x</sub>-N and NO<sub>y</sub>-N; Tian et al., 2018), were used as inputs to drive LPJ-GUESS, selecting the representative grid cell (0.5°×0.5°) for each experimental site.” Also in Lines 352-357: “For global-scale applications, climate variables—daily temperature (minimum, mean, and maximum), precipitation, solar radiation, specific humidity, and wind speed from CRUJRA v2.4 dataset—were used for driving model simulations, ranging from 1901–2020 at a resolution of 0.5°×0.5° (Harris et al., 2020; Kobayashi et al., 2015). Historical annual atmospheric CO<sub>2</sub> concentration and monthly N deposition rates over the same period were derived from Meinshausen et al. (2020) and Tian et al. (2018), respectively.”

Soil physical characteristics, such as texture and pH, are provided as external inputs to LPJ-GUESS for hydraulic property calculation. All these physical characteristics are treated as constant throughout the experimental periods. To make it clear, we will add a description in Sect. 2.3.1. Suggested revision: “Additionally, to estimate soil hydraulic properties and evaluate our developed N transformation processes, soil physical characteristics—such as soil pH and texture (i.e., content of sand, silt, and clay)—were collected from the literature and kept constant during the simulation period.”

*The site-level evaluation is convincing, but the global-scale results require further discussion. Based on Figures 6 and 7, the simulated N<sub>2</sub>O emissions from pastures are not entirely convincing. It would be expected to see higher N<sub>2</sub>O fluxes from pastures starting in the 1980s onward, given the increased use of manure and fertilizers during this period. Additionally, how does the model account for manure deposition from livestock waste on grazing pastures? This aspect should be clarified to better understand the model's representation of pasture emissions.*

We agree with the reviewer's comment that the simulated N<sub>2</sub>O fluxes from pastures since the 1980s in our study are generally lower than other estimates. This underestimate can be attributed to two main reasons: (a) the current version of LPJ-GUESS used in this study is not equipped with N fertilization on pastures, the relevant work is still under development; and (b) before our N<sub>2</sub>O development work was completed, we had not found a suitable global N application data set for pastures (including chemical

fertilizer and manure use). Overall, the exclusion of fertilized pastures is the primary driver for the low N<sub>2</sub>O fluxes simulated on global pastures in this study. To avoid confusion, we have clarified this limitation throughout the original manuscript. For instance, in Abstract (Line 33): “Our estimates only account for the direct soil N<sub>2</sub>O emissions, excluding those from fertilized pasture”. Also in Sect. 2.3.2 (Lines 366-367): “At present, pasture ecosystems represented in LPJ-GUESS do not receive any N fertilizer inputs”. In addition, we have compared our results with other findings and gave an in-depth discussion in Sect. 4.3 (Lines 727-733): “Both modelling and EF-based approaches indicated that managed grasslands were strong N<sub>2</sub>O sources, with emissions of 1.5-2.2 Tg N yr<sup>-1</sup> between 2000-2006, including contributions from livestock excreta deposition, manure use, and N fertilizer application (Dangal et al., 2019; Oenema et al., 2005). In this study, LPJ-GUESS did not account for the effects of N management on pasture, which may have resulted in an underestimation of soil N<sub>2</sub>O emissions across global land. However, a long-term gridded dataset for fertilizer and manure application on pasture has recently become available (HaNi; Tian et al., 2022), offering the possibility of incorporating fertilized grasslands into our future model simulations.”

In the default setup of LPJ-GUESS, 75% of the harvested N from aboveground biomass is assumed to return to the soil annually, in order to represent internal manure deposition from livestock on grazing pastures. To make it clear, we will bring this description to Sect. 2.1. Suggested revision: “To account for internal manure deposition from livestock on pastures, the model assumes that 75% of the nitrogen from the harvested biomass is returned to the soil (Lindeskog et al., 2013).”

*Line78: “... (DGVMs)”, a citation of DGVM would be appreciated.*

A citation will be added as the reviewer suggested. In the revised manuscript, we will change the sentence accordingly: “The implementation of N<sub>2</sub>O-related processes into global biosphere models, such as Dynamic Global Vegetation Models (DGVMs; Cramer et al., 2001) only began in the early years of this century.”

*Line 119 “...of a proportion of the aboveground biomass”, What is the proportion used in the model? It appears to be a dynamic variable that varies depending on the study region, but what is the default value applied in your global simulation? This information is important for understanding the baseline assumptions and how they influence the results.*

In the default global configuration, half of the aboveground biomass is harvested every year to account for the grazing effects. As the reviewer suggested, this sentence will be corrected in the revised manuscript: “Pasture ecosystems are modelled as a competition between C<sub>3</sub> and C<sub>4</sub> grasses, with 50% of the aboveground biomass removed annually to represent grazing effects.”

*Line347: Could you provide specific details on how the soil physical characteristics are set up at the study sites? Are these characteristics treated as constant throughout the experimental periods, or are they modeled as time-dynamic variables?*

Thanks for this comment. Please refer to our previous responses above.

*Figure 4c: Why is there such a large mismatch between the simulation and observations in April?*

Most field measurements have reported transit pulses of N<sub>2</sub>O during spring in high-latitude natural land ecosystems, when soils undergo seasonal freezing and thawing. This is largely due to enhanced nutrient release during soil freeze events, stimulated by microbial mortality and the physical breakdown of soil aggregates. However, these processes associated with freeze-thaw cycles have not yet been implemented in LPJ-GUESS or other models. This explains the lower simulated N<sub>2</sub>O fluxes than field observations in April shown in Fig. 4c.

We have included this discussion in the third paragraph of Sect. 4.1 in our original manuscript: “In addition, the large differences between simulated and measured N<sub>2</sub>O monthly fluxes were seen during the spring when the soil underwent seasonal freezing and thawing (Fig. 3). These N<sub>2</sub>O increases associated with freeze-thaw cycles are difficult to simulate because of challenges in parameterizing the transient pulses of nutrient availability in the micro-environment (Zhang et al., 2017b). The impacts of soil freeze events on nutrient release—stimulated by microbial mortality and the physical breakdown of soil aggregates—have not been represented in either LPJ-GUESS or other process-based models (Tian et al., 2019), despite many field measurements reporting their importance for annual N<sub>2</sub>O emissions (Kazmi et al., 2023; Wagner-Riddle et al., 2024).”

*Sect. 3.1.2: What is the soil texture at the study sites? In most Dynamic Global Vegetation Models, the simulated WFPS is highly sensitive to soil texture, with very fine soils typically exhibiting higher WFPS. An accurate representation of hydrology in the model would significantly improve the simulation of all N<sub>2</sub>O-related processes that depend on WFPS (see your Figure 1). Since different soil texture classes undoubtedly affect WFPS, a brief explanation of how WFPS is associated with soil texture in your model would be greatly appreciated.*

Soil texture information for all evaluated sites, collected from the literature, is publicly available through the Zenodo repository (<https://doi.org/10.5281/zenodo.14169306>). In the revised manuscript, we will also include soil texture information when comparing the simulated and observed WFPS at the study sites. For example, the addition in Sect. 3.1.2: “Soil moisture was identified as the dominant factor controlling the seasonal dynamics of N<sub>2</sub>O fluxes at a semi-arid grassland with a sandy loam soil texture, where observed WFPS ranged from 0.01-0.48 between June and August (Du et al., 2006). While the model effectively represented this N<sub>2</sub>O rise due to increasing WFPS, it overestimated total emissions by ~95% over the summer season (Fig. 4h). This overestimation primarily resulted from the model simulating a higher WFPS value of 0.37 for this sand-dominant soil, compared with the observed average of 0.20 in these three months”. Also, in Sect. 3.1.3: “At this site with silt-clay textured soil, the simulated seasonal trends of soil WFPS and temperature broadly aligned with the observed variations (Pearson correlation coefficients of 0.42-0.57,  $p < 0.05$  for both variables), despite the modelled WFPS values being consistently higher than the observed ones.”

We agree with the reviewer’s perspective that accurately representing WFPS based on soil texture can improve the model’s performance in simulating N<sub>2</sub>O fluxes. Therefore, an in-depth discussion of soil moisture limitations on the simulated N<sub>2</sub>O emissions was provided in our original manuscript (Lines 717-729): “The current LPJ-GUESS version we used only models two soil layers (i.e., 0-50 cm and 50-150 cm; see Smith et al., 2014; Wårlind et al., 2014). Soil organic matter has no defined placement within the soil column, and the N transformation processes implemented in this study are influenced solely by the temperature and moisture of the top layer (see Sect. 2.2). Given the 50 cm thickness, soil water variability during rain events is minimal, which explains the absence of any distinct WFPS peaks in our modelling results (Fig. 5; Fig. S3 in Supporting Information). In reality, however, most N<sub>2</sub>O-related hydrological processes occur very close to the surface, where soil saturation and drying take place rapidly over short periods. Additionally, soil water content is currently simulated between the wilting point and field capacity (Smith et al., 2014), indicating that fully saturated or completely dry soils cannot be represented in the model. This constraint would consequently impact the simulated WFPS values across different soil textures, which, in turn, affects all other N transformation processes relying on WFPS (see Fig. 1). To better account for gaseous N losses from the soil, the improvement of soil hydrological scheme within LPJ-GUESS remains to be taken into account in future model development.”

*Figure 7: Here again, the low N<sub>2</sub>O emission on global grazing pasture makes non-sense to me due to the livestock waste inputs and N fertilizer use in the recent decades.*

Thanks for this comment. Please refer to our previous responses above.

*Line745-752: How do N<sub>2</sub>O emissions in the model respond to different agricultural management practices, such as fertilizer application, tillage, or crop rotation? How closely do the simulated results align with real-world observations? Additionally, are these management practices explicitly included in your global simulations? If not, I think your discussion is not strongly supported.*

Cropland management practices implemented in LPJ-GUESS include tillage, crop residue retention, industrial N fertilizer and manure application, and cover cropping (both leguminous and non-leguminous). Given the widespread adoption of conventional practices in global agricultural soils, our large-scale simulations in this study assume that all croplands are managed with tillage and without cover cropping systems, with 25% of aboveground crop residue retained in the fields after harvest. Additionally, all crops receive time-dynamic N fertilizer and manure inputs over the years, with the timing of application varying by crop type. We have clarified these management practice setups in the first paragraph of Sect. 2.1 in the original manuscript already (Lines 125-133).

Unfortunately, we do not have any results on N<sub>2</sub>O emissions in response to different agricultural management practices on a global scale at present, which is outside the scope of our current study. However, as a case study, we primarily investigated the influence of the above-mentioned practices on cropland N<sub>2</sub>O fluxes over Europe during the historical period (see the Table and Figure below; please note that the results presented below have not been published yet). Preliminary simulation results suggest that, compared with the standard management (STD), using cover cropping (especially for the legume cover crops CC<sub>L</sub>) and 100% of residue retention (RR) practices would significantly enhance cropland N<sub>2</sub>O emissions, while no-tillage system (NT) has the potential to mitigate gaseous N emissions to the atmosphere. Although these magnitudes of N<sub>2</sub>O fluxes under different management practices by LPJ-GUESS have not been evaluated or compared against other existing findings, the model does realistically reflect the responses of N<sub>2</sub>O emissions to conservation agriculture to some extent. Therefore, we believe it is reasonable to focus our future work on the trade-off between CO<sub>2</sub> uptake and N<sub>2</sub>O emissions resulting from conservation practices on a large scale (see Lines 745-752 in the original manuscript).

**Simulation setups representing various cropland management practices over Europe**

|                       | CC <sub>L</sub> | CC <sub>NL</sub> | RR   | NT  | STD |
|-----------------------|-----------------|------------------|------|-----|-----|
| Legume cover crop     | Yes             | No               | No   | No  | No  |
| Non-legume cover crop | No              | Yes              | No   | No  | No  |
| Residue retention     | 25%             | 25%              | 100% | 25% | 25% |
| Manure application    | Yes             | Yes              | Yes  | Yes | Yes |
| Mineral N fertilizer  | Yes             | Yes              | Yes  | Yes | Yes |
| Tillage               | Yes             | Yes              | Yes  | No  | Yes |

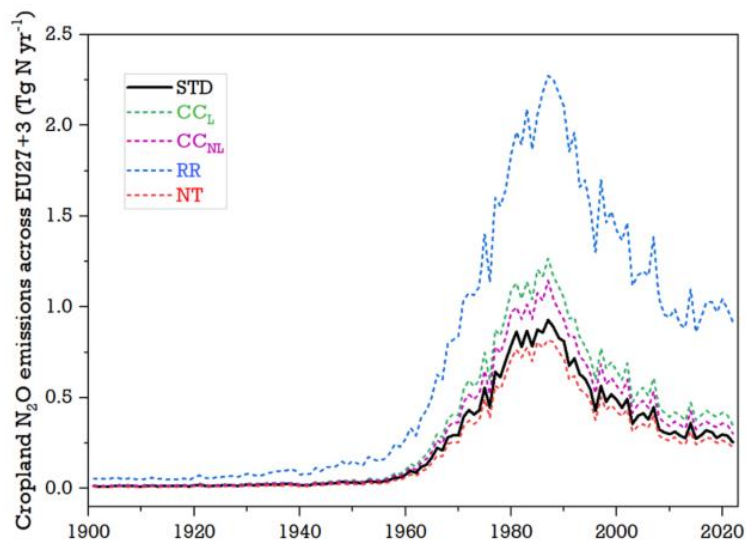

## References

- Cramer, W., Bondeau, A., Woodward, F. I., Prentice, I. C., Betts, R. A., Brovkin, V., Cox, P. M., Fisher, V., Foley, J. A., Friend, A. D., Kucharik, C., Lomas, M. R., Ramankutty, N., Sitch, S., Smith, B., White, A. and Young-Molling, C.: Global response of terrestrial ecosystem structure and function to CO<sub>2</sub> and climate change: Results from six dynamic global vegetation models, *Glob. Chang. Biol.*, 7(4), 357–373, doi:10.1046/j.1365-2486.2001.00383.x, 2001.
- Dangal, S. R. S., Tian, H., Xu, R., Chang, J., Canadell, J. G., Ciais, P., Pan, S., Yang, J. and Zhang, B.: Global Nitrous Oxide Emissions From Pasturelands and Rangelands: Magnitude, Spatiotemporal Patterns, and Attribution, *Global Biogeochem. Cycles*, 33(2), 200–222, doi:10.1029/2018GB006091, 2019.
- Harris, I., Osborn, T. J., Jones, P. and Lister, D.: Version 4 of the CRU TS monthly high-resolution gridded multivariate climate dataset, *Sci. Data*, 7, 109, doi:10.1038/s41597-020-0453-3, 2020.
- Kazmi, F. A., Espenberg, M., Pärn, J., Masta, M., Ranniku, R., Thayamkottu, S. and Mander, Ü.: Meltwater of freeze-thaw cycles drives N<sub>2</sub>O-governing microbial communities in a drained peatland forest soil, *Biol. Fertil. Soils*, doi:10.1007/s00374-023-01790-w, 2023.
- Kobayashi, S., Ota, Y., Harada, Y., Ebata, A., Moriya, M., Onoda, H., Onogi, K., Kamahori, H., Kobayashi, C., Endo, H., Miyaoka, K. and Kiyotoshi, T.: The JRA-55 reanalysis: General specifications and basic characteristics, *J. Meteorol. Soc. Japan*, 93(1), 5–48, doi:10.2151/jmsj.2015-001, 2015.
- Lindeskog, M., Arneeth, A., Bondeau, A., Waha, K., Seaquist, J., Olin, S. and Smith, B.: Implications of accounting for land use in simulations of ecosystem carbon cycling in Africa, *Earth Syst. Dyn.*, 4(2), 385–407, doi:10.5194/esd-4-385-2013, 2013.

Meinshausen, M., Nicholls, Z. R. J., Lewis, J., Gidden, M. J., Vogel, E., Freund, M., Beyerle, U., Gessner, C., Nauels, A., Bauer, N., Canadell, J. G., Daniel, J. S., John, A., Krummel, P. B., Luderer, G., Meinshausen, N., Montzka, S. A., Rayner, P. J., Reimann, S., Smith, S. J., Van Den Berg, M., Velders, G. J. M., Vollmer, M. K. and Wang, R. H. J.: The shared socio-economic pathway (SSP) greenhouse gas concentrations and their extensions to 2500, *Geosci. Model Dev.*, 13(8), 3571–3605, doi:10.5194/gmd-13-3571-2020, 2020.

Oenema, O., Wrage, N., Velthof, G. L., Van Groenigen, J. W., Dolfing, J. and Kuikman, P. J.: Trends in global nitrous oxide emissions from animal production systems, *Nutr. Cycl. Agroecosystems*, 72(1), 51–65, doi:10.1007/s10705-004-7354-2, 2005.

Smith, B., Wårlind, D., Arneth, A., Hickler, T., Leadley, P., Siltberg, J. and Zaehle, S.: Implications of incorporating N cycling and N limitations on primary production in an individual-based dynamic vegetation model, *Biogeosciences*, 11(7), 2027–2054, doi:10.5194/bg-11-2027-2014, 2014.

Tian, H., Yang, J., Lu, C., Xu, R., Canadell, J. G., Jackson, R. B., Arneth, A., Chang, J., Chen, G., Ciais, P., Gerber, S., Ito, A., Huang, Y., Joos, F., Lienert, S., Messina, P., Olin, S., Pan, S., Peng, C., Saikawa, E., Thompson, R. L., Vuichard, N., Winiwarter, W., Zaehle, S., Zhang, B., Zhang, K. and Zhu, Q.: The global N<sub>2</sub>O model intercomparison project, *Bull. Am. Meteorol. Soc.*, 99(6), 1231–1251, doi:10.1175/BAMS-D-17-0212.1, 2018.

Tian, H., Yang, J., Xu, R., Lu, C., Canadell, J. G., Davidson, E. A., Jackson, R. B., Arneth, A., Chang, J., Ciais, P., Gerber, S., Ito, A., Joos, F., Lienert, S., Messina, P., Olin, S., Pan, S., Peng, C., Saikawa, E., Thompson, R. L., Vuichard, N., Winiwarter, W., Zaehle, S. and Zhang, B.: Global soil nitrous oxide emissions since the preindustrial era estimated by an ensemble of terrestrial biosphere models: Magnitude, attribution, and uncertainty, *Glob. Chang. Biol.*, 25(2), 640–659, doi:10.1111/gcb.14514, 2019.

Tian, H., Bian, Z., Shi, H., Qin, X., Pan, N., Lu, C., Pan, S., Tubiello, F. N., Chang, J., Conchedda, G., Liu, J., Mueller, N., Nishina, K., Xu, R., Yang, J., You, L. and Zhang, B.: History of anthropogenic Nitrogen inputs (HaNi) to the terrestrial biosphere: a 5 arcmin resolution annual dataset from 1860 to 2019, *Earth Syst. Sci. Data*, 14(10), 4551–4568, doi:10.5194/essd-14-4551-2022, 2022.

Wagner-Riddle, C., Congreves, K. A., Brown, S. E., Helgason, W. D. and Farrell, R. E.: Overwinter and Spring Thaw Nitrous Oxide Fluxes in a Northern Prairie Cropland Are Limited but a Significant Proportion of Annual Emissions, *Global Biogeochem. Cycles*, 38(4), doi:10.1029/2023GB008051, 2024.

Wårlind, D., Smith, B., Hickler, T. and Arneth, A.: Nitrogen feedbacks increase future terrestrial ecosystem carbon uptake in an individual-based dynamic vegetation model, *Biogeosciences*, 11(21), 6131–6146, doi:10.5194/bg-11-6131-2014, 2014.

Zhang, K., Peng, C., Wang, M., Zhou, X., Li, M., Wang, K., Ding, J. and Zhu, Q.: Process-based TRIPLEX-GHG model for simulating N<sub>2</sub>O emissions from global forests and grasslands: Model development and evaluation, *J. Adv. Model. Earth Syst.*, 2079–2102, doi:10.1002/2017MS000934, 2017b.
